# Supplementary material
Source: PubMed Central journal article supplement (PMC2638954)

# **Roles of extensins in cotyledon primordium formation and shoot apical meristem activity in *Nicotiana tabacum***

**Author:** XueLian Zhang, Jie Zhao\*

**Fig. S1.** The localization of extensins in embryos isolated from the ovules treated with or without 3,4-DHP using JIM20 monoclonal antibody by immunofluorescence microscopy. Fluorescent images are shown in **A-F** and the corresponding bright-field micrographs in **a-f**. **A.** An early heart-shaped embryo isolated from the ovule without 3,4-DHP treatment showed fluorescence labeling. **B.** A late heart-shaped embryo isolated from the ovule without 3,4-DHP treatment showed fluorescence labeling. **C.** An early heart-shaped embryo isolated from the ovule treated with 3,4-DHP showed faint fluorescence signal. **D.** An abnormal embryo isolated from the ovules treated with 3,4-DHP showed faint fluorescence signal. **E.** A heart embryo without JIM20 antibody showed no signal. **F.** A globular embryo without JIM20 antibody showed no signal. Bar=50  $\mu$ m.

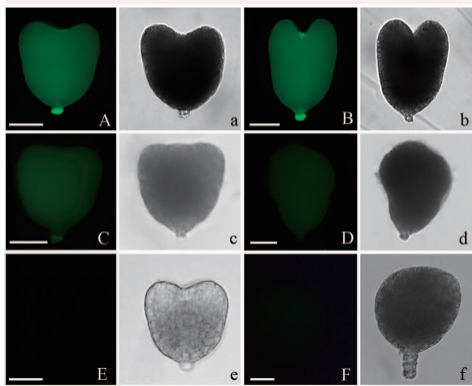

Supplement: ern245_1.pdf [file ern245_1.pdf]
